# Supplementary material for: A Multivariate Multi-Step LSTM Forecasting Model for Tuberculosis Incidence With Model Explanation in Liaoning Province, China
Source: Research Square preprint supplement (doi:10.21203/rs.3.rs-986856/v1), 2021-10-19
Supplement: Supplementary file 1 [file 142d2ba10dd1bd0a429a7097.docx]

**A multivariate multi-step LSTM forecasting model for tuberculosis incidence with model explanation in Liaoning Province, China**

Enbin Yang1,2, Hao Zhang1,2,3, Xinsheng Guo1,2, Zhen Liu1,4, Yuanning Liu1,2,3*

1College of Computer Science and Technology, Jilin University, 130012, Changchun, China.

2Key Laboratory of Symbolic Computation and Knowledge Engineering of Ministry of Education, Jilin University, 130012, Changchun, China.

3College of Software, Jilin University, 130012, Changchun, China.

4Graduate School of Engineering, Nagasaki Institute of Applied Science, 536 Aba-machi, 851-0193, Nagasaki, Japan.

*Correspondence: [liuyn@jlu.edu.cn](mailto:liuyn@jlu.edu.cn)

When we solved the model, all the factors were given a variable name to simply express the meaning of the factors, as in Supplementary Table T1. Among them, each meteorological data was taken from seven meteorological monitoring stations in Liaoning province, which are Changwu, Chaoyang, Shenyang, Benxi, Yingkou, Dandong, and Dalian. The additional files "*raw_economic_and_social_data.xls*" and "*raw_meteorological_data.xls*" store the raw values of all the factor data. values for all factors, however, there are many missing values.

**Supplementary Table T1** Variable names and factor names

| **Factor Category** | **Variable Name** | **Factor Name (unit)** |
| --- | --- | --- |
| **Meteorological**  **data** | avr_air_pressure | Average air pressure (hPa) |
| avr_wind_spd | Average 2-minute wind speed (m/s) |
| avr_temp | Average temperature (℃) |
| avr_water_pressure | Average water pressure (hPa) |
| rel_humidity | Average relative humidity (%) |
| day_precipitation | Number of days with daily precipitation ≥ 0.1mm (days) |
| month_sun | Monthly sunshine percentage (%) |
| hour_sun | Sunshine hours (h) |
| extreme_wind_speed | Extreme wind speed (m/s) |
| min_air_pressure | Minimum air pressure (hPa) |
| min_temp | Minimum temperature (℃) |
| max_air_pressure | Maximum air pressure (hPa) |
| max_temp | Maximum temperature (℃) |
| max_wind_speed | Maximum wind speed (m/s) |
| day_max_precipitation | Maximum daily precipitation (mm) |
| **Economic**  **and**  **social data** | power | Electricity generation (billion kWh) |
| industrial_add | Value added of industries above the scale  (Year-on-year growth %) |
| sales_rate | Industrial product sales rate (%) |
| fin_budget | Local budget revenue (cumulative growth %) |
| cpi_rural | Rural Consumer Price Index |
| cpi_urban | Urban Consumer Price Index |
| cpi | Average Consumer Price Index |
| pas_turn_road | Road passenger turnover |
| pas_turn_water | Waterway passenger turnover |
| pas_turn | Average passenger turnover |
| im_ex | Total value of imports and exports to and from domestic destinations/sources (thousands of USD) |
| residential_investment | Residential investment volume  (Cumulative year-on-year %) |
| ex_factory_index | Ex-factory price index of industrial products |

**Supplementary Figure F1** AIC and BIC heat maps of the ARIMA model

**Supplementary Figure F2** Relationship between morbidity and various factors
